# Supplementary material for: ComplexEye - a multi lens array microscope for High-Throughput embedded immune cell migration analysis
Source: Research Square preprint supplement (doi:10.21203/rs.3.rs-2362121/v1), 2023-02-17
Supplement: Supplementary file 1 [file 25ac5be57487db3cb34fcdfc.docx]

**ComplexEye - a multi lens array microscope for High-Throughput embedded immune cell migration analysis**

Zülal Cibir1*, Jacqueline Hassel2*, Justin Sonneck3, Lennart Kowitz3, Alexander Beer1, Andreas Kraus1, Gabriel Hallekamp2, Martin Rosenkranz2, Pascal Raffelberg2, Sven Olfen2, Kamil Smilowski2, Roman Burkard2, Iris Helfrich4, Susmita Ghosh3, Albert Sickmann3,5,6, Anne-Kathrin Klebl7, Jan Eike Eickhoff7, Bert Klebl7, Karsten Seidl2, Jianxu Chen3, Anton Grabmaier2, Reinhard Viga2*, Matthias Gunzer1,3*

**Supplemental material**

8 supplemental videos + legends

One supplemental figure

One supplemental table

**Supplemental video description**

**Video S1. ComplexEye 3D overall view**

3D animation of the central components of the ComplexEye. Related to figure 2b.

**Video S2. ComplexEye 3D view of the microscope unit**

3D animation with a detailed view of the imaging units and the 8 mm lenses. Related to figure 2b.

**Video S3. Long-term recording of migrating cancer cells.**

CT26 colorectal carcinoma cells were incubated on 96-well flat bottom plates and imaged with ComplexEye at one frame per minute for 11 hours.

**Video S4. fMLP treated neutrophil migration**

Freshly isolated neutrophils from healthy donors were plated on a 96-well flat bottom plate and recorded with the ComplexEye. Shown is aone-hour movie of neutrophils stimulated with fMLP. Real time between frames is 8 seconds.

**Video S5. ComplexEye comparison with a conventional microscope**

Freshly isolated neutrophils from healthy donors were plated on two 96-well flat bottom plates and recorded simultaneously at the ComplexEye and a commercial microscope from Leica. Neutrophils were treated with PBS, fMLP, CXCL1 and CXCL8 and were imaged for one hour with 8 seconds between frames. Note the comparable optical performance and migratory behavior of neutrophils. Related to figure 3a.

**Video S6. Compounds gradually decreasing fMLP-induced speed**

Freshly isolated neutrophils from healthy donors were plated on a 384-well flat bottom plate, treated with 1 of 1,000 compounds and stimulated with fMLP. Several compounds strongly decreased the fMLP-induced speed of neutrophils. Shown are four compounds gradually decreasing the speed from 80-20%. As a comparison the fMLP and PBS control movies are shown. Related to figure 4b-c. Compound names correspond to the positions on the migration screen shown in figure 4b.

**Video S7. Compounds gradually decreasing fMLP-induced activity**

Freshly isolated neutrophils from healthy donors were plated on a 384-well flat bottom plate, treated with 1 of 1,000 compounds and stimulated with fMLP. Several compounds strongly decreased the fMLP-induced activity of neutrophils. Shown are four compounds gradually decreasing the activity from 80-20%. As a comparison the fMLP and PBS control movies are shown. Related to figure 4d. Compound names correspond to the positions on the migration screen shown in figure 4b.

**Video S8. Compounds modifying neutrophil shape**

Freshly isolated neutrophils from healthy donors were plated on a 384-well flat bottom plate, treated with 1 of 1,000 compounds and stimulated with fMLP. Several compounds strongly modified the shape of neutrophils. Shown are three compounds differently changing neutrophil morphology. As a comparison the fMLP movie with typical migratory cell shape of neutrophils is shown. Related to figure 4f. Compound names correspond to the positions on the migration screen shown in figure 4b.


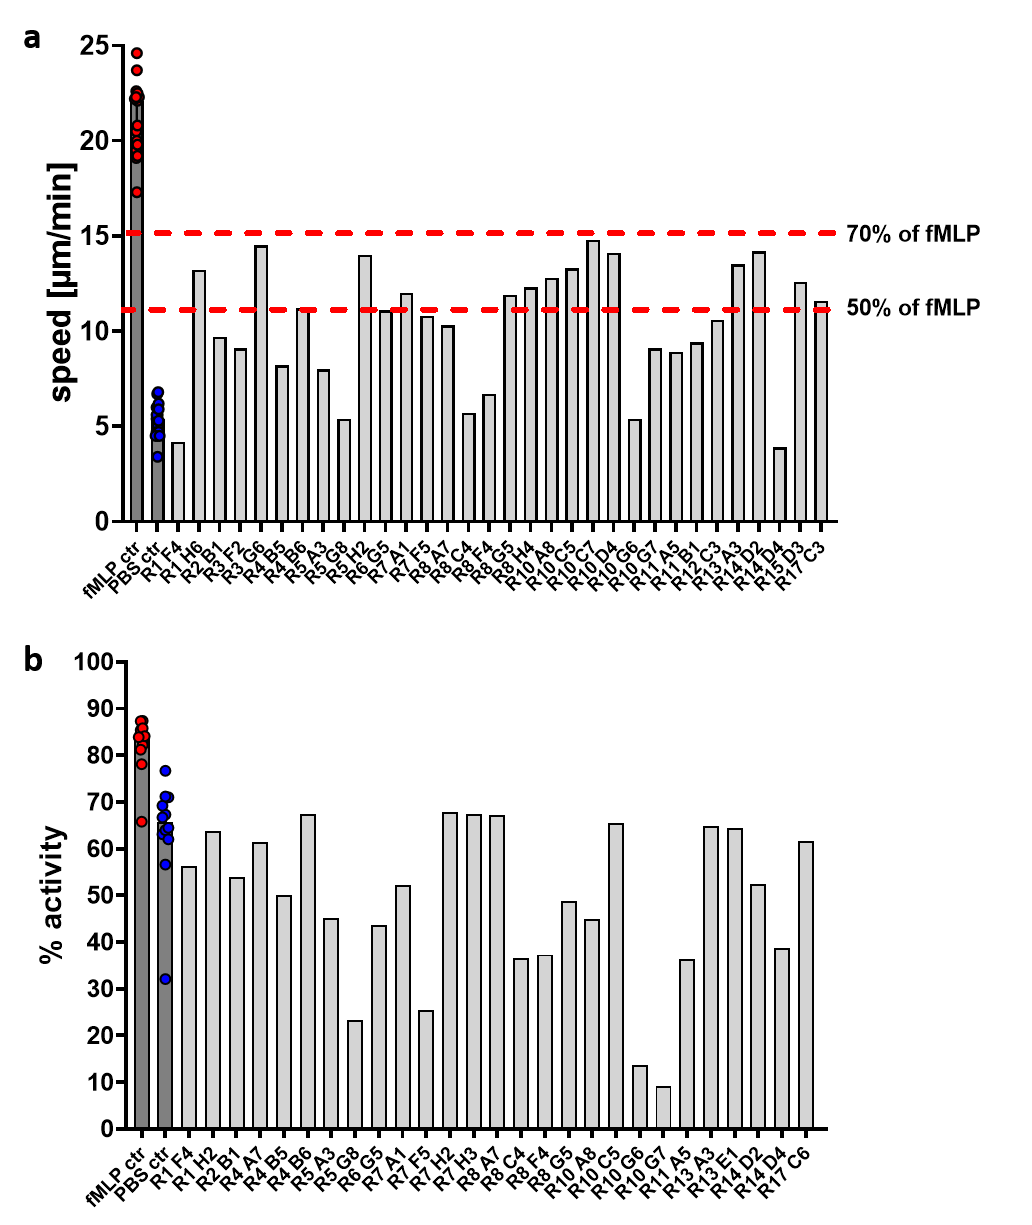


*Figure S1* ***|* Motility values of neutrophils modified by compounds.***Freshly isolated neutrophils from healthy donors were plated on a 384-well plate, treated with 1 of 1,000 compounds and stimulated with fMLP. Cells were imaged for one hour with 8 seconds between frames with ComplexEye and subsequently all single cells were automatically tracked for speed in µm/min and % moving cells (activity). Several compounds strongly decreased the fMLP-induced speed and activity of neutrophils.* ***a,*** *Speed values of 32 compounds and all fMLP and PBS controls. The dots in the fMLP ctr and PBS ctr bars show the speed values from all rounds in which the 32 compounds were detected. The bars in fMLP ctr or PBS ctr indicate the median with interquartile range indicated by lines. Dashed red lines indicate the 70% and 50% speed level.* ***b,*** *Activity values of 27 compounds and the fMLP and PBS controls. All compounds decreased the activity of neutrophils to 80% or lower. The dots in the fMLP ctr and PBS ctr bars show the activity from all rounds in which the 27 compounds were detected. The bars indicate the median with interquartile range indicated by lines. Related to figure 4.*

| **Compound name** | **Chemical target** | **Speed modifier** | **% speed reduction** |
| --- | --- | --- | --- |
| R10 G6 | PI3K; AKT | Yes | 84.4 |
| R14 D4 | Bacterial | Yes | 83.8 |
| R1 F4 | AMPK | Yes | 81.2 |
| R8 C4 | RARα | Yes | 78.2 |
| R5 G8 | CaMK | Yes | 77.0 |
| R8 F4 | PDI | Yes | 75.2 |
| R4 B5 | ROS | Yes | 66.1 |
| R8 H4 | JAK2; STAT3 | Yes | 53.5 |
| R3 F2 | mTOR; PI3K | Yes | 62.9 |
| R5 A3 | NF-B | Yes | 62.0 |
| R8 A7 | JNK | Yes | 61.6 |
| R2 B1 | EGFR | Yes | 58.7 |
| R12 B4 | EGFR | No | 10% speed increase |
| R8 G5 | FLT3 | Yes | 56.5 |
| R11 A5 | ROCK | Yes | 55.0 |
| R10 G7 | VCP | Yes | 53.8 |
| R4 B6 | Phosphatase | Yes | 52.9 |
| R11 B1 | EGFR | Yes | 52.6 |

**Table S1. Overview of the chemical targets of speed-reducing compounds**

PI3K/AKT: Phosphoinositide 3-kinase/Protein kinase B

AMPK: 5' AMP-activated protein kinase

RARα: retinoic acid receptor α

cAMK: Ca2+/calmodulin-dependent protein kinase

PDI: protein disulfide isomerase

ROS: reactive oxygen species

JAK2: Janus kinase 2

STAT3: Signal transducer and activator of transcription 3

mTOR: mammalian target of rapamycin

NF-B: Nuclear factor kappa-light-chain-enhancer of activated B cells

JNK: c-Jun N-terminal kinase

EGFR: epidermal growth factor receptor

FLT3: FMS-like receptor tyrosine kinase-3

ROCK: Rho-associated coiled-coil containing protein kinase

VCP: Valosin-containing protein

R12 B4 is shown, since it targets EGFR, but unlike the other EGFR-inhibitor R2 B1 does not lead to a speed reduction but rather the opposite, a 10% speed increase over neutrophils stimulated with fMLP alone. R12 B4 and R2 B1 belong to the same substance group, while R11 B1 is of a different chemical group.
